# Supplementary material
Source: publisher site journal article supplement (https://www.spandidos-publications.com/245/downloadSupplementary)

Figure S1. Expression of lncRNA LOH12CR2 in various types of cancer. BLCA, bladder urothelial carcinoma; BRCA, breast invasion carcinoma; HNSC, head and neck squamous cell carcinoma; STAD, stomach adenocarcinoma.

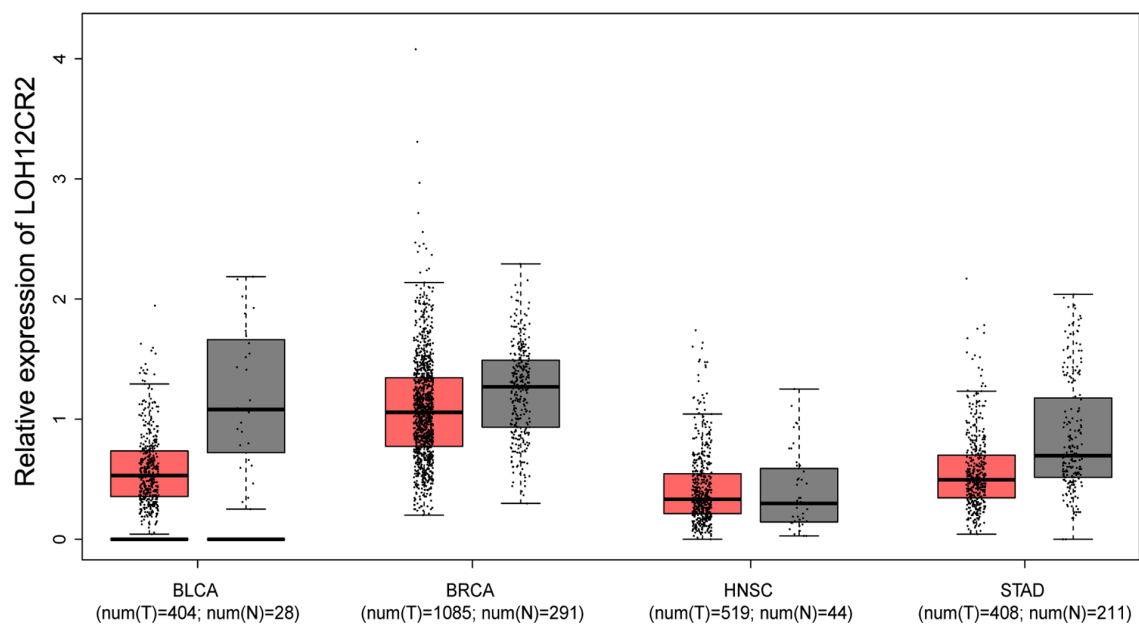

Figure S2. Expression correlation analysis for lncRNA PART1 and associated DEmRNAs including WNT6 and CHRM1. Horizontal axis: Normalized PART1 expression levels; vertical axis: Normalized DEmRNA expression levels. DE, differentially expressed; WNT6, Wnt family member 6; CHRM1, cholinergic receptor muscarinic 1.

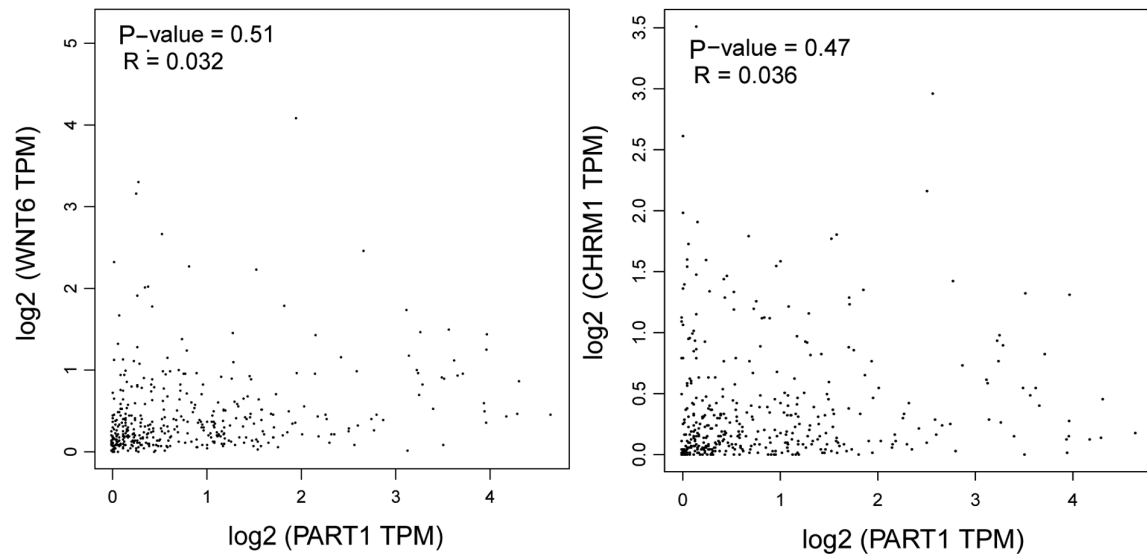

Figure S3. Expression levels of 7 DE mRNAs in gastric cancer tissues and adjacent normal tissues based on microarray results and RT-qPCR. \*P<0.05, statistically significant difference. DE, differentially expressed.

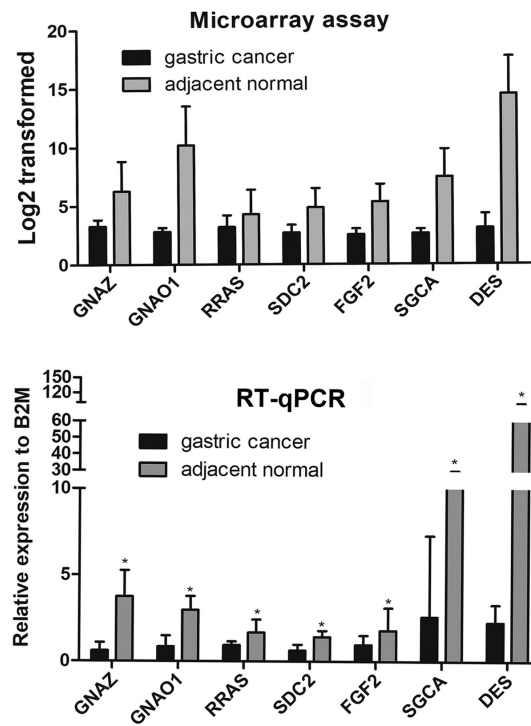

Supplement: Supplementary file 1 [file downloadSupplementary]
